# Supplementary material for: Anti-Oxidant and Anti-Inflammatory Substance Generated Newly in Paeoniae Radix Alba Extract Fermented with Plant-Derived Lactobacillus brevis 174A
Source: MDPI journal article supplement (doi:10.3390/antiox10071071), 2021-07-02
Supplement: s1 [file s1]

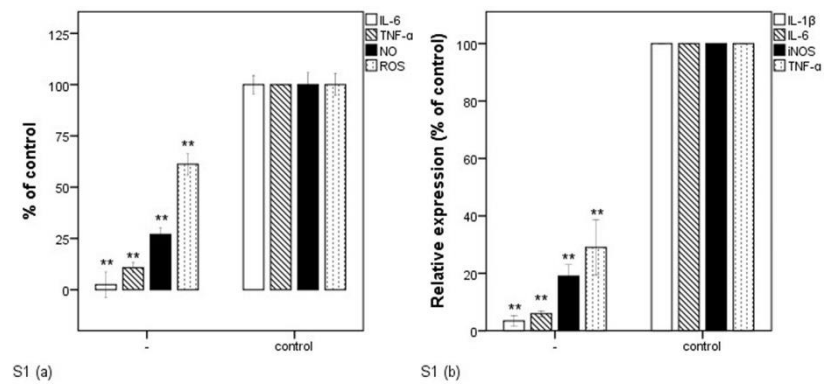

**Figure S1.** (a) Increase in IL-6, TNF- $\alpha$ , NO, and intracellular ROS (measured in percent of control) in RAW 264.7 cells treated with LPS for 24 h. (b) Increase in relative mRNA expressions of IL-1 $\beta$ , IL-6, iNOS, and TNF- $\alpha$  (measured in percent of control) in the RAW 264.7 macrophage cells treated with LPS for 6 h. Data are expressed as the mean value of at least triplicate experiments. Error bars represent  $\pm$  standard deviation. \*\* $p < 0.01$  versus control. -: untreated cells; control: cells treated with 1  $\mu$ g/ml LPS.

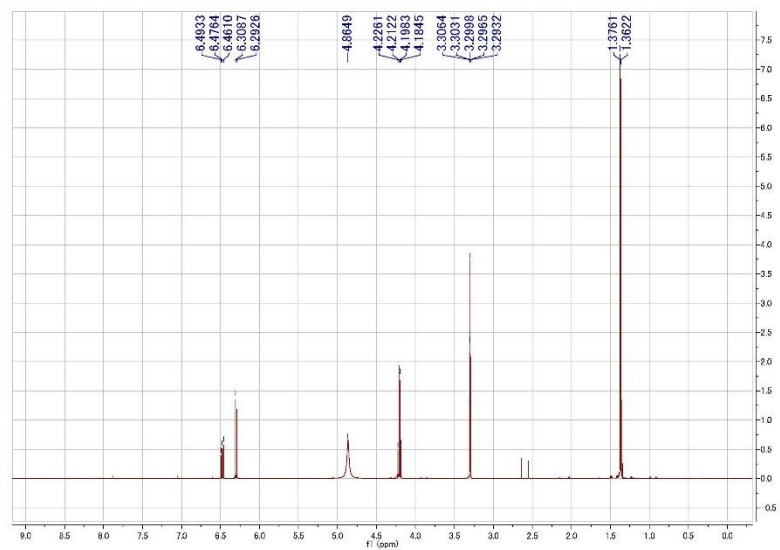

(a)  $^1\text{H}$ -NMR spectrum

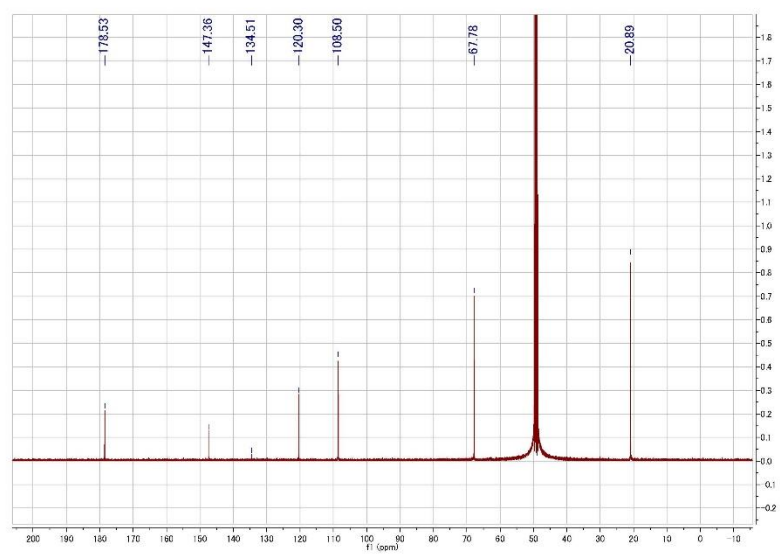

(b)  $^{13}\text{C}$ -NMR spectrum

**Figure S2.** NMR spectrum of the isolated pyrogallol sample.
